# Supplementary material for: Interfacial engineering of nickel/iron/ruthenium phosphides for efficient overall water splitting powered by solar energy
Source: Royal Society of Chemistry journal article supplement (doi:10.1039/d1ta08385f), 2021-11-29
Supplement: d1ta08385f1.pdf [file d1ta08385f1.pdf]

Electronic Supplementary Material (ESI) for Journal of Materials Chemistry A. This  
journal is © The Royal Society of Chemistry 2021

## **Supporting Information**

### **Interfacial engineering of nickel/iron/ruthenium phosphides for efficient overall water splitting powered by solar energy**

*Sheng-Hao Cai, Xiao-Nan Chen, Meng-Jie Huang, Ji-Yuan Han, Yu-Wei Zhou, and Ji-Sen Li\**

*Department of Chemistry and Chemical Engineering, Jining University, Qufu 273155, P. R. China.*

*E-mail: senjili@sina.com*

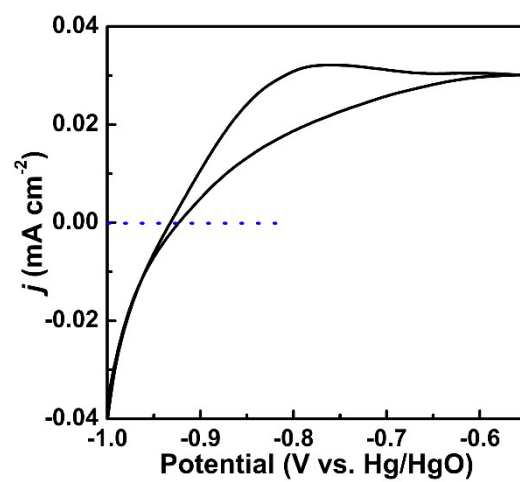

**Fig. S1** Single cycle CV curves of Hg/HgO electrode calibration in 1.0 M KOH.

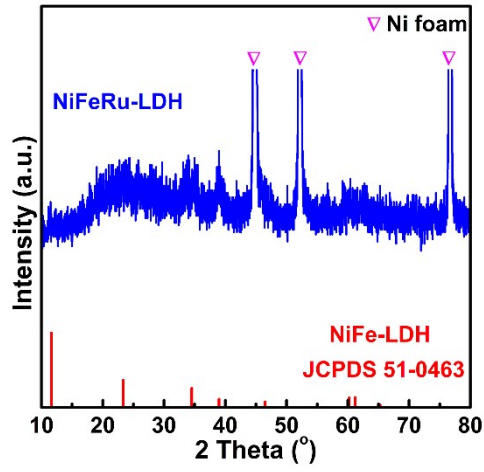

Fig. S2 PXRD patterns of NiFeRu-LDH.

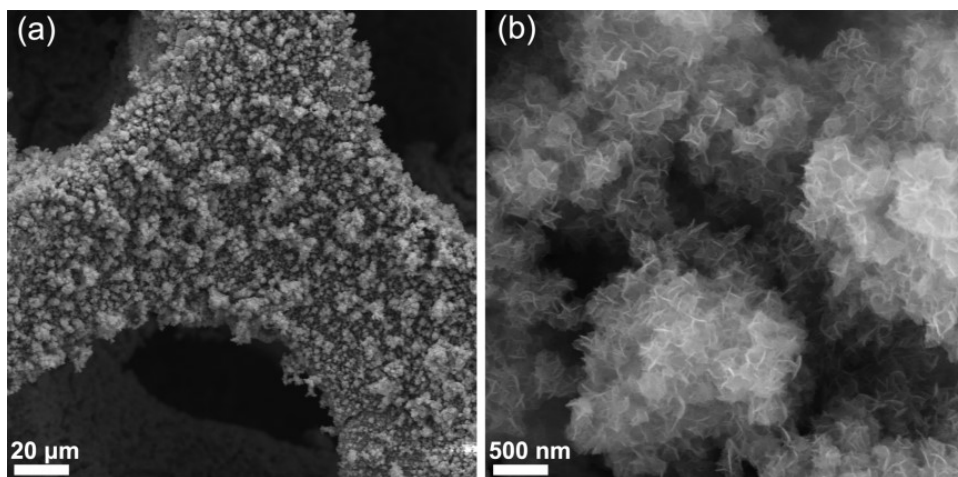

**Fig. S3** (a, b) SEM images of NiFeRu-LDH/NF.

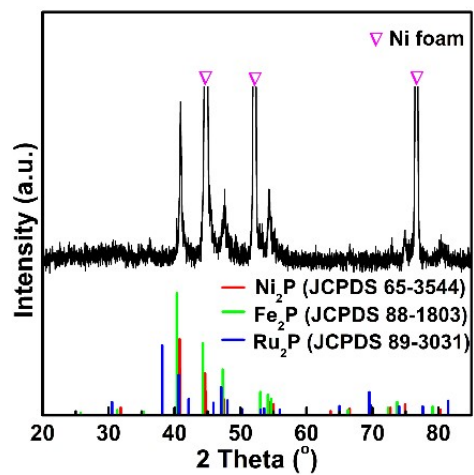

**Fig. S4** PXRD patterns of Ni<sub>2</sub>P-Fe<sub>2</sub>P-Ru<sub>2</sub>P/NF.

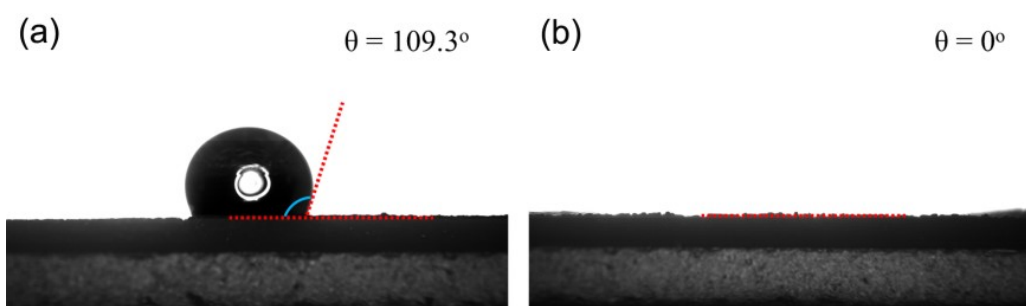

**Fig. S5** Contact angles of NF (a) and Ni<sub>2</sub>P-Fe<sub>2</sub>P-Ru<sub>2</sub>P /NF (b).

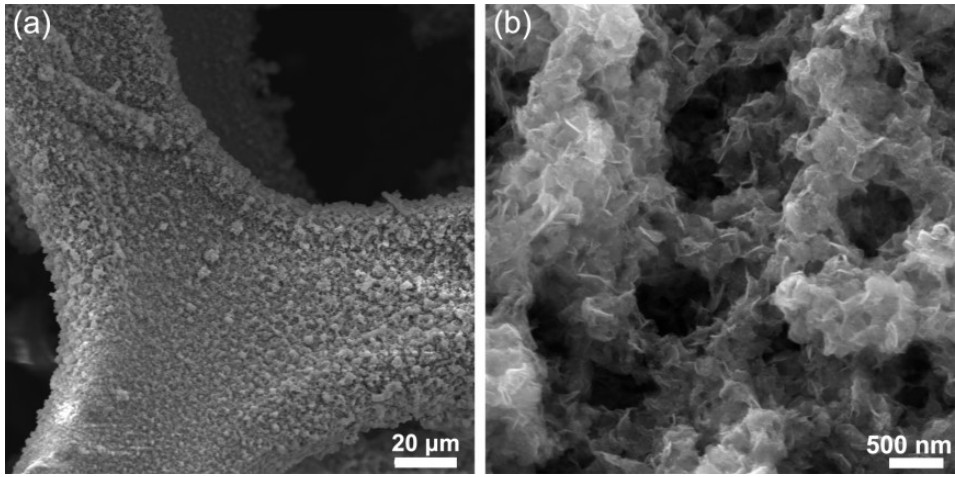

**Fig. S6** (a, b) SEM images of NiFe-LDH/NF.

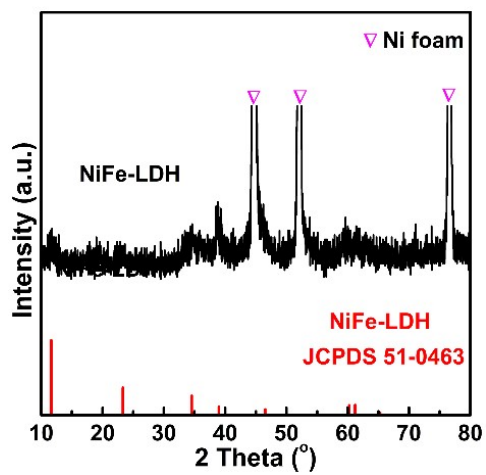

Fig. S7 PXRD patterns of NiFe-LDH.



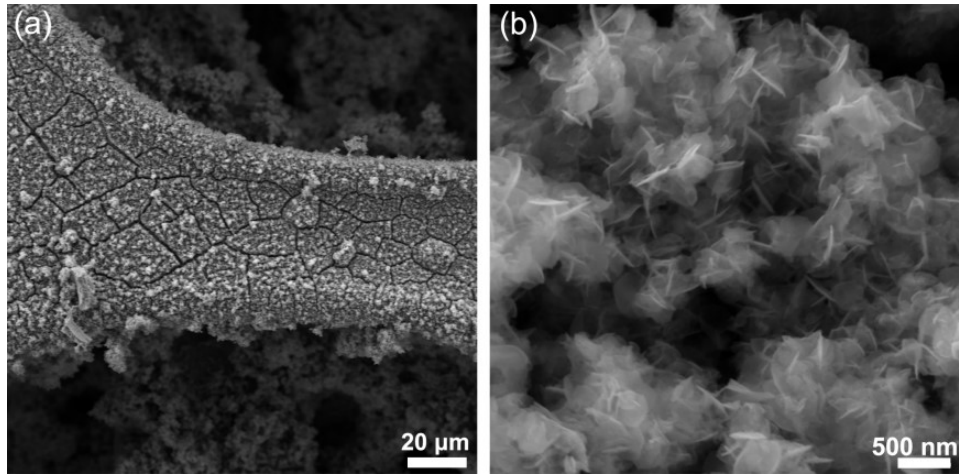

**Fig. S8** (a, b) SEM images of  $\text{Ni}_2\text{P-Fe}_2\text{P/NF}$ .

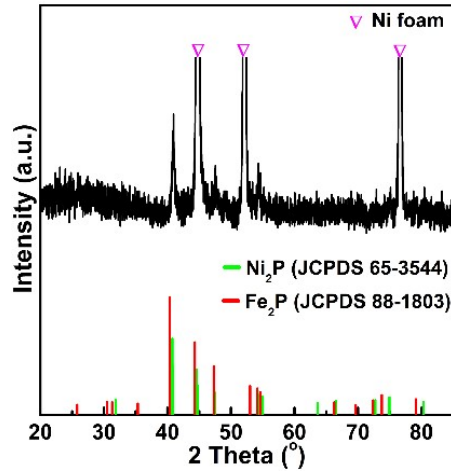

**Fig. S9** XRD patterns of Ni<sub>2</sub>P-Fe<sub>2</sub>P/NF.

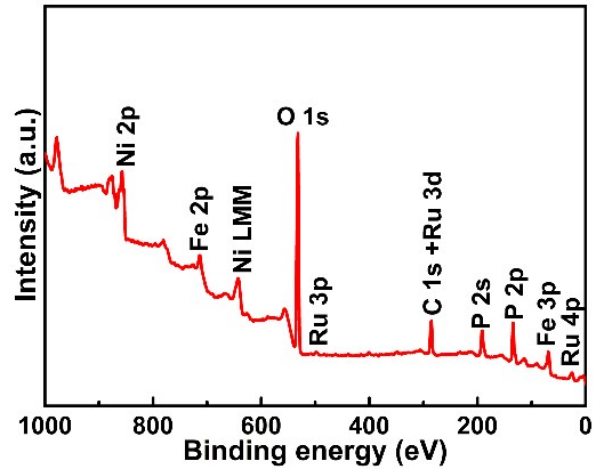

**Fig. S10** The survey XPS spectrum for Ni<sub>2</sub>P-Fe<sub>2</sub>P-Ru<sub>2</sub>P/NF.

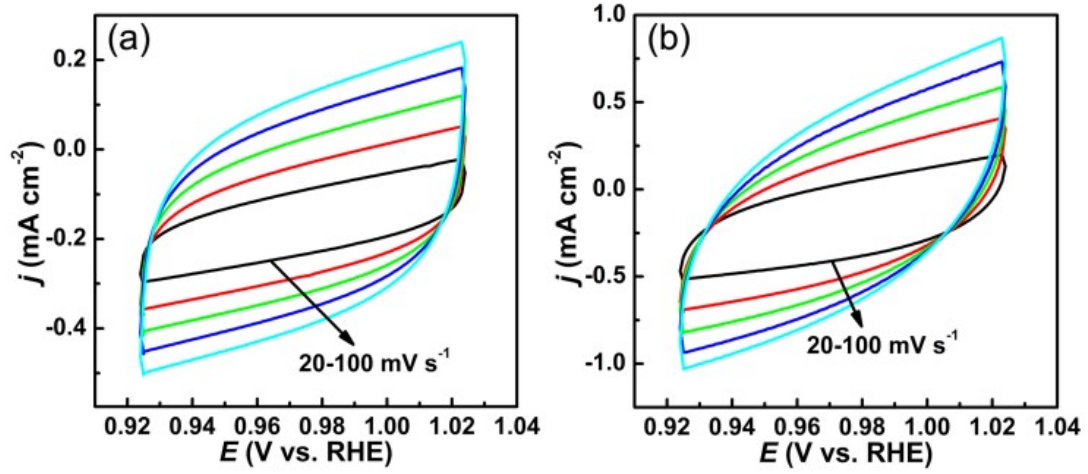

**Fig. S11** CV curves of Ni<sub>2</sub>P-Fe<sub>2</sub>P/NF (a) and Ni<sub>2</sub>P-Fe<sub>2</sub>P-Ru<sub>2</sub>P/NF (b) in the non-Faradaic potential region recorded at different scan rates.

Calculation of ECSA:

$$\text{ECSA} = \frac{C_{dl}}{C_s}$$

$$\text{ECSA}_{\text{Ni}_2\text{P-Fe}_2\text{P/NF}} = \frac{2.33 \text{ mF cm}^{-2}}{40 \mu\text{F cm}^{-2}} = 58.3 \text{ cm}^{-2}_{\text{ECSA}}$$

$$\text{ECSA}_{\text{Ni}_2\text{P-Fe}_2\text{P-Ru}_2\text{P/NF}} = \frac{4.45 \text{ mF cm}^{-2}}{40 \mu\text{F cm}^{-2}} = 111.2 \text{ cm}^{-2}_{\text{ECSA}}$$

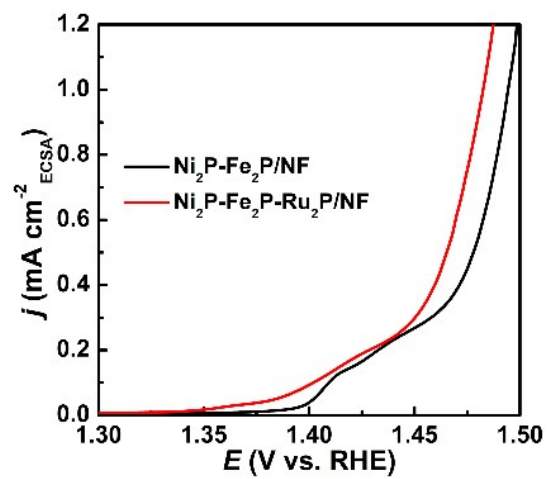

**Fig. S12** OER activity of different catalysts in 1 M KOH normalized by ECSA.

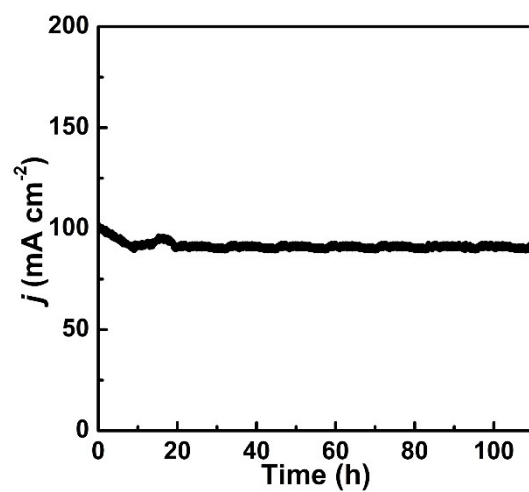

**Fig. S13** Durability test of Ni<sub>2</sub>P-Fe<sub>2</sub>P-Ru<sub>2</sub>P/NF at 100 mA cm<sup>-2</sup> for OER.

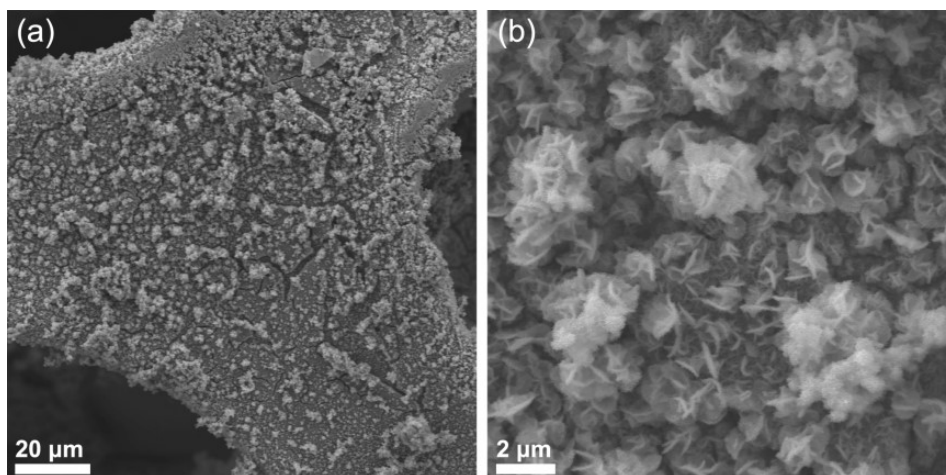

**Fig. S14** (a, b) SEM images of Ni<sub>2</sub>P-Fe<sub>2</sub>P-Ru<sub>2</sub>P/NF after OER stability.

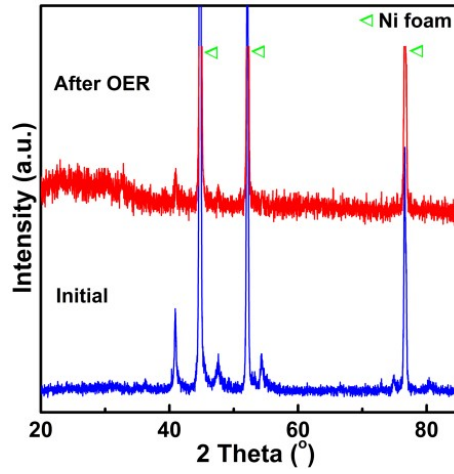

**Fig. S15** XRD patterns of Ni<sub>2</sub>P-Fe<sub>2</sub>P-Ru<sub>2</sub>P/NF before and after stability test for the OER.



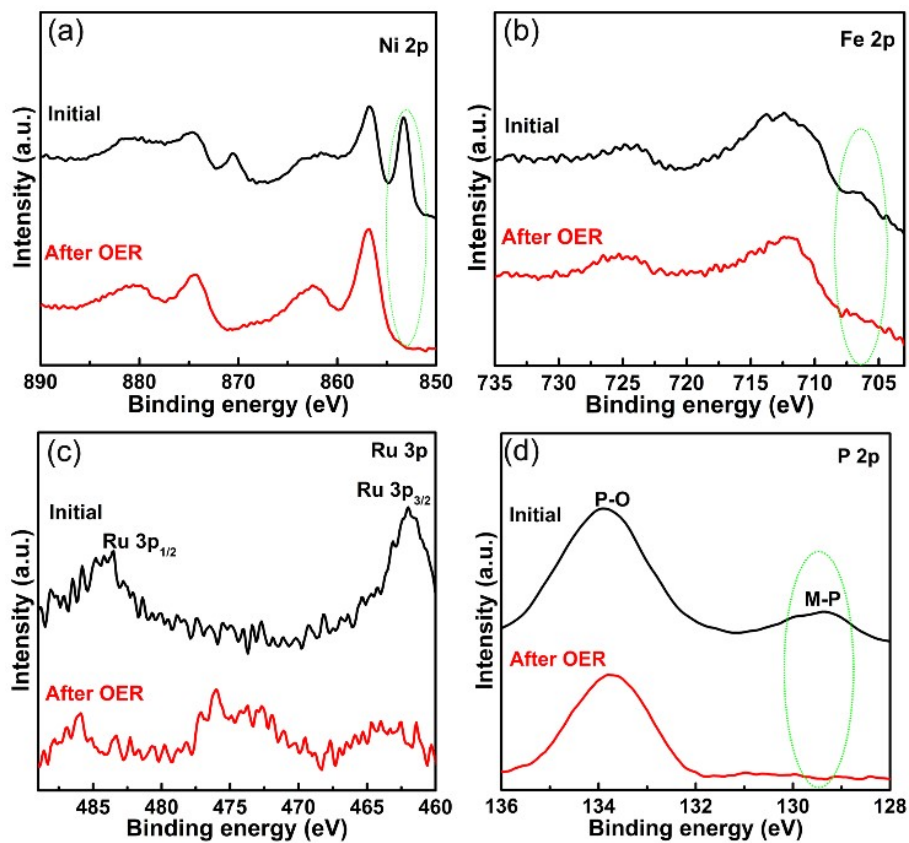

**Fig. S16** High-resolution XPS spectra of (a) Ni 2p, (b) Fe 2p, (c) Ru 3p, and P 2p of  $\text{Ni}_2\text{P-Fe}_2\text{P-Ru}_2\text{P/NF}$  initial and after OER stability testing for the OER.

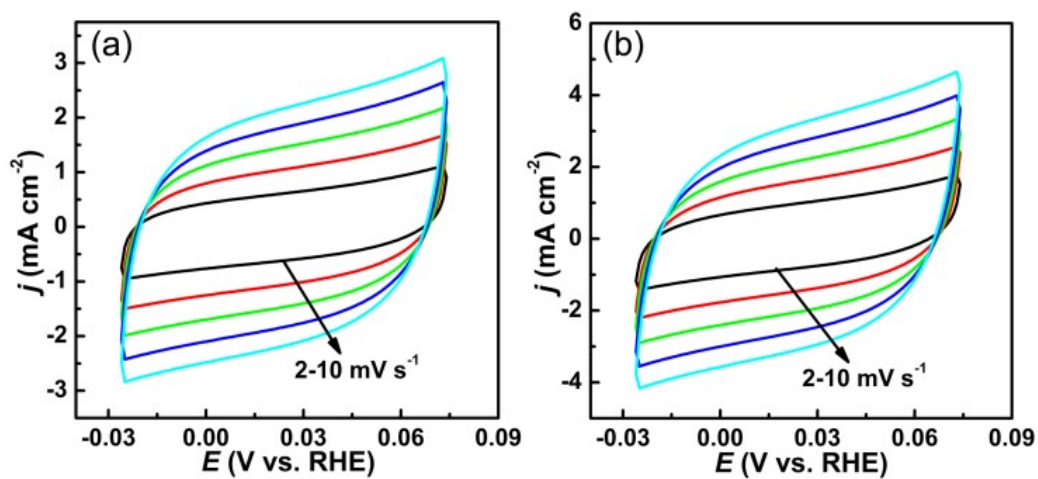

**Fig. S17** CV curves of Ni<sub>2</sub>P-Fe<sub>2</sub>P/NF (a) and Ni<sub>2</sub>P-Fe<sub>2</sub>P-Ru<sub>2</sub>P/NF (b) in the non-Faradaic potential region recorded at different scan rates.

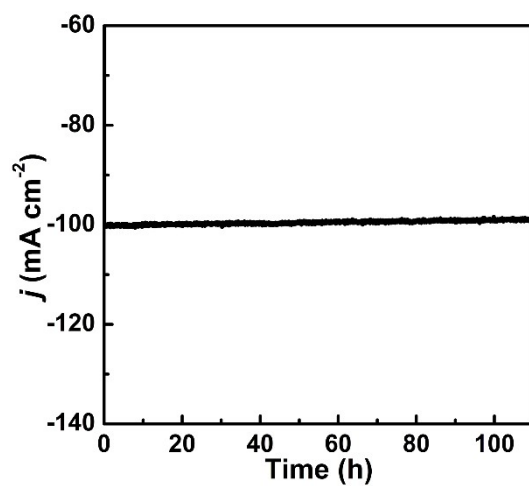

**Fig. S18** Durability test of Ni<sub>2</sub>P-Fe<sub>2</sub>P-Ru<sub>2</sub>P/NF at 100 mA cm<sup>-2</sup> for OER.

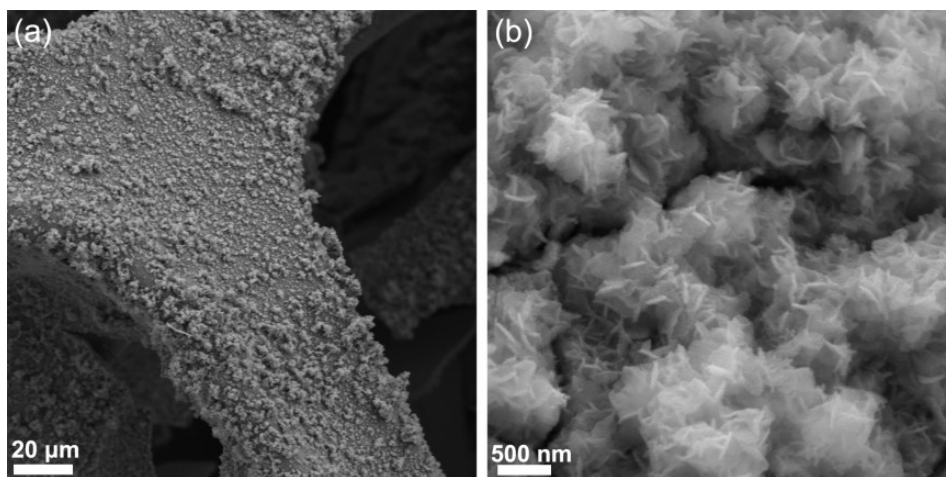

**Fig. S19** (a, b) SEM images of  $\text{Ni}_2\text{P-Fe}_2\text{P-Ru}_2\text{P/NF}$  after the HER stability.

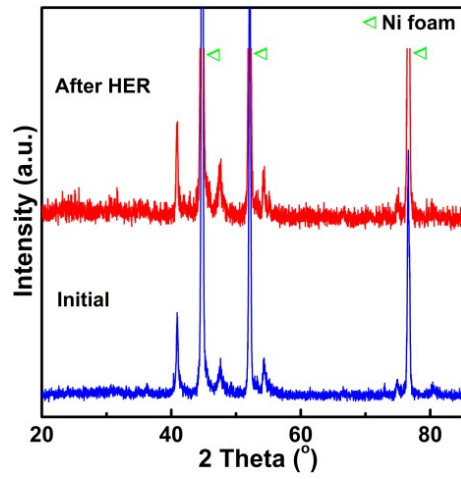

**Fig. S20** PXR D patterns of  $\text{Ni}_2\text{P-Fe}_2\text{P-Ru}_2\text{P/NF}$  before and after stability test for the HER.

**Table S1.** Comparing the electrocatalytic OER performance of Ni<sub>2</sub>P-Fe<sub>2</sub>P-Ru<sub>2</sub>P/NF with many catalysts recently reported.

| Catalysts                                                                            | Tafel<br>slop<br>(mV dec <sup>-1</sup> ) | $\eta^{10}$<br>(mV) | Reference                                          |
|--------------------------------------------------------------------------------------|------------------------------------------|---------------------|----------------------------------------------------|
| <b>Ni<sub>2</sub>P-Fe<sub>2</sub>P-Ru<sub>2</sub>P/NF</b>                            | <b>30.5</b>                              | <b>195</b>          | <b>This work</b>                                   |
| Mo-Ni <sub>3</sub> S <sub>2</sub> /Ni <sub>x</sub> P <sub>y</sub> /NF                | 60.6                                     | /                   | <i>Adv. Energy. Mater.</i> 2020, 10, 1903891.      |
| NiMoO <sub>x</sub> /NiMoS                                                            | 34                                       | 186                 | <i>Nat. Commun.</i> 2020, 11, 5462.                |
| MoS <sub>2</sub> /Co <sub>9</sub> S <sub>8</sub> /Ni <sub>3</sub> S <sub>2</sub> /Ni | 58                                       | 166                 | <i>J. Am. Chem. Soc.</i> 2019, 141, 10417          |
| CoMoS <sub>4</sub> /Ni <sub>3</sub> S <sub>2</sub>                                   | 63                                       | 200                 | <i>J. Power Sources</i> 2019, 416, 95.             |
| Porous Ni <sub>3</sub> S <sub>4</sub>                                                | 67                                       | 257                 | <i>Adv. Funct. Mater.</i> 2019, 29, 1900315.       |
| Co <sub>2</sub> P NCs                                                                | 60                                       | 280                 | <i>Adv. Mater.</i> 2018, 30, 1705796.              |
| Ni <sub>2</sub> P-CoP                                                                | 69                                       | 320                 | <i>ACS Appl. Mater. Interfaces</i> 2017, 9, 23222. |
| NiCoP/C                                                                              | 96                                       | 330                 | <i>Angew. Chem. Int. Ed.</i> 2017, 56, 3897.       |
| MAF-X27-OH                                                                           | 88                                       | 292                 | <i>J. Am. Chem. Soc.</i> 2016, 138, 8336           |

**Table S2.** Comparing the electrocatalytic HER performance of Ni<sub>2</sub>P-Fe<sub>2</sub>P-Ru<sub>2</sub>P/NF with many catalysts recently reported.

| Catalysts                                                                            | Tafel slop<br>(mV dec <sup>-1</sup> ) | $\eta^{10}$<br>(mV) | Reference                                     |
|--------------------------------------------------------------------------------------|---------------------------------------|---------------------|-----------------------------------------------|
| <b>Ni<sub>2</sub>P-Fe<sub>2</sub>P-Ru<sub>2</sub>P/NF</b>                            | <b>85.1</b>                           | <b>78.6</b>         | <b>This work</b>                              |
| Mo-Ni <sub>3</sub> S <sub>2</sub> /Ni <sub>x</sub> P <sub>y</sub> /NF                | 68.4                                  | 109                 | <i>Adv. Energy Mater.</i> 2020, 10, 1903891.  |
| CoMoS <sub>4</sub> /Ni <sub>3</sub> S <sub>2</sub>                                   | 169                                   | 158                 | <i>J. Power Sources</i> 2019, 416, 95.        |
| Ni <sub>2</sub> P-Fe <sub>2</sub> P/NF                                               | 86                                    | 128                 | <i>Adv. Funct. Mater.</i> 2020, 30, 2006484.  |
| NiFeP/NCH                                                                            | 125                                   | 216                 | <i>J. Am. Chem. Soc.</i> 2019, 141, 7906.     |
| MoS <sub>2</sub> /Co <sub>9</sub> S <sub>8</sub> /Ni <sub>3</sub> S <sub>2</sub> /Ni | 85                                    | 113                 | <i>J. Am. Chem. Soc.</i> 2019, 141, 10417     |
| (Co <sub>1-x</sub> Ni <sub>x</sub> )(S <sub>1-y</sub> Py) <sub>2</sub> /G            | 85                                    | 117                 | <i>Adv. Energy Mater.</i> 2018, 8, 1802319.   |
| Ni <sub>12</sub> P <sub>5</sub> /Ni <sub>3</sub> (PO <sub>4</sub> ) <sub>2</sub> -HS | 93.1                                  | 114                 | <i>Appl. Catal. B Environ</i> 2017, 204, 486. |

**Table S3.** Comparing the electrocatalytic performance of Ni<sub>2</sub>P-Fe<sub>2</sub>P-Ru<sub>2</sub>P/NF with recently reported catalysts for overall water splitting.

| Catalysts                                                                            | Cell voltage (V) | Reference                                      |
|--------------------------------------------------------------------------------------|------------------|------------------------------------------------|
| <b>Ni<sub>2</sub>P-Fe<sub>2</sub>P-Ru<sub>2</sub>P/NF</b>                            | <b>1.49</b>      | <b>This work</b>                               |
| Fe-CoP/Ni(OH) <sub>2</sub>                                                           | 1.52             | <i>Adv. Funct. Mater.</i> 2021, 31, 2101578.   |
| Mo-Ni <sub>3</sub> S <sub>2</sub> /NixPy/NF                                          | 1.46             | <i>Adv. Energy. Mater.</i> 2020, 10, 1903891.  |
| NiCoP@NiMn LDH/NF                                                                    | 1.51             | <i>Appl. Mater. Interfaces</i> 2020, 12, 4385. |
| Cr-doped FeNiP/NCN                                                                   | 1.5              | <i>Adv. Mater.</i> 2019, 31, 1900178.          |
| NiFeP/SG                                                                             | 1.54             | <i>Nano Energy</i> 2019, 58, 870.              |
| NiFeP/NCH                                                                            | 1.59             | <i>J. Am. Chem. Soc.</i> 2019, 141, 7906.      |
| MoS <sub>2</sub> /Co <sub>9</sub> S <sub>8</sub> /Ni <sub>3</sub> S <sub>2</sub> /Ni | 1.54             | <i>J. Am. Chem. Soc.</i> 2019, 141, 10417      |
| Mo-doped CoP/CC                                                                      | 1.56             | <i>Nano Energy</i> 2018, 48, 73.               |
